# Supplementary material for: Compulsive methamphetamine taking in the presence of punishment is associated with increased oxytocin expression in the nucleus accumbens of rats
Source: PubMed Central journal article supplement (PMC5566486; doi:10.1038/s41598-017-08898-8), 2017-08-21
Supplement: 41598_2017_8898_MOESM1_ESM.pdf [file 41598_2017_8898_MOESM1_ESM.pdf]

Compulsive methamphetamine taking in the presence of punishment is associated with increased oxytocin expression in the nucleus accumbens of rats.

Irina N. Krasnova, Maria Carla Gerra, Donna Walther, Subramaniam Jayanthi, Bruce Ladenheim, Michael T. McCoy, Christie Brannock, and Jean Lud Cadet

**Supplement Table S1. Classification of genes in the NAc with altered expression in rats receiving footshocks alone.**

| GenBank<br>Accession              | Symbol    | Description                                                                                                                  | Fold                     |                     | Fold Change<br>YSR vs YSS |
|-----------------------------------|-----------|------------------------------------------------------------------------------------------------------------------------------|--------------------------|---------------------|---------------------------|
|                                   |           |                                                                                                                              | Fold Change<br>YSR vs CT | Change<br>YSS vs CT |                           |
| <i>Metabolism</i>                 |           |                                                                                                                              |                          |                     |                           |
| NM_001271366                      | Mki67     | marker of proliferation Ki-67                                                                                                | 1.05                     | 1.71                | -1.63                     |
| NM_013015                         | Ptgds     | prostaglandin D2 synthase (brain)                                                                                            | 1.34                     | -1.26               | 1.68                      |
| ENSRNOT00000044<br>617            | Ndufb411  | NADH dehydrogenase (ubiquinone) 1<br>beta subcomplex, 4-like 1                                                               | 1.72                     | 1.35                | 1.27                      |
| NM_001106181                      | Dus2      | dihydrouridine synthase 2                                                                                                    | -2.01                    | -2.04               | 1.01                      |
| <i>MicroRNA</i>                   |           |                                                                                                                              |                          |                     |                           |
| MTA_TR020001649<br>6.mm           | Mir3098   | microRNA 3098                                                                                                                | 1.92                     | 3.28                | -1.71                     |
| NR_037392                         | Mir344b-1 | microRNA 344-b1                                                                                                              | -1.04                    | 1.72                | -1.79                     |
| NR_037373                         | Mir3580   | microRNA mir-3580                                                                                                            | -1.74                    | -1.53               | -1.13                     |
| NR_032278_2                       | Mir434    | rno-mir-3543                                                                                                                 | 1.46                     | -1.51               | 2.21                      |
| <i>Oxygen Transport</i>           |           |                                                                                                                              |                          |                     |                           |
| NM_033234                         | Hbb       | hemoglobin                                                                                                                   | -1.28                    | -2.11               | 1.65                      |
| NM_013096                         | Hba1      | hemoglobin, alpha 1                                                                                                          | -1.17                    | -1.77               | 1.52                      |
| ENSRNOT00000048<br>977            | Hba2      | hemoglobin, alpha 2                                                                                                          | -1.21                    | -1.67               | 1.38                      |
| NM_198776                         | Hbb-b1    | hemoglobin, beta adult major chain                                                                                           | -1.61                    | -3.63               | 2.26                      |
| <i>Protein Kinase/Phosphatase</i> |           |                                                                                                                              |                          |                     |                           |
| NM_017336                         | Ptpro     | protein tyrosine phosphatase, receptor<br>type, O                                                                            | 1.66                     | -1.09               | 1.82                      |
| NM_031769                         | Pdxk      | pyridoxal (pyridoxine, vitamin B6)<br>kinase; similar to pyridoxal (pyridoxine,<br>vitamin B6) kinase; pyridoxal kinase-like | 1.74                     | 1.64                | 1.06                      |
| NM_053551                         | Pdk4      | pyruvate dehydrogenase kinase, isozyme<br>4                                                                                  | 1.84                     | 1.15                | 1.59                      |
| <i>Proteolysis</i>                |           |                                                                                                                              |                          |                     |                           |
| NM_020091                         | Cym       | chymosin                                                                                                                     | -2.61                    | 1.65                | -4.30                     |
| <i>Signal Transduction</i>        |           |                                                                                                                              |                          |                     |                           |
| NM_001000365                      | Olr748    | olfactory receptor 748                                                                                                       | -1.37                    | -1.72               | 1.26                      |
| NM_001106431                      | Stoml3    | stomatin (Epb7.2)-like 3                                                                                                     | -1.31                    | 1.40                | -1.83                     |
| <i>Transcription</i>              |           |                                                                                                                              |                          |                     |                           |
| NM_019328                         | Nr4a2     | nuclear receptor subfamily 4, group A,<br>member 2                                                                           | 1.72                     | 1.79                | -1.04                     |

**Supplement Table S2. Genes with altered expression the NAc of rats receiving comparable number of footshocks in the presence or absence of METH SA.**

| <b>GenBank<br/>Accession</b>      | <b>Symbol</b> | <b>Description</b>                                                          | <b>Fold<br/>Change<br/>SR vs YSR</b> | <b>Fold<br/>Change<br/>SS vs YSS</b> |
|-----------------------------------|---------------|-----------------------------------------------------------------------------|--------------------------------------|--------------------------------------|
| <i>Cell Adhesion</i>              |               |                                                                             |                                      |                                      |
| NM_001034009                      | Mcam          | melanoma cell adhesion molecule                                             | 1.55                                 | 1.72                                 |
| NM_022285                         | Hapln2        | hyaluronan and proteoglycan link protein 2                                  | 1.34                                 | 1.73                                 |
| <i>Cell Growth</i>                |               |                                                                             |                                      |                                      |
| NM_030868                         | Nov           | nephroblastoma overexpressed                                                | -1.56                                | -2.25                                |
| <i>Hormonal</i>                   |               |                                                                             |                                      |                                      |
| NM_012829                         | Cck           | cholecystokinin                                                             | -2.28                                | -2.49                                |
| NM_012996                         | Oxt           | oxytocin/neurophysin 1 prepropeptide                                        | 5.98                                 | -1.00                                |
| NM_016992                         | Avp           | arginine vasopressin                                                        | 1.80                                 | -1.08                                |
| <i>Immunity</i>                   |               |                                                                             |                                      |                                      |
| NM_012752                         | Cd24          | CD24 molecule                                                               | -1.14                                | -1.66                                |
| NM_001191752                      | Ccdc77        | coiled-coil domain containing 77                                            | 3.00                                 | 2.42                                 |
| NM_016994                         | C3            | complement component 3                                                      | 1.07                                 | 1.68                                 |
| <i>Metabolism</i>                 |               |                                                                             |                                      |                                      |
| NM_022224                         | Pter          | phosphotriesterase related                                                  | 1.04                                 | -1.68                                |
| NM_133395                         | Serinc5       | serine incorporator 5                                                       | 1.65                                 | 1.66                                 |
| <i>MicroRNA</i>                   |               |                                                                             |                                      |                                      |
| NR_037370                         | Mir1912       | microRNA 1912                                                               | -1.79                                | -1.23                                |
| MTA_TR1900001750.mm               | Mir3970       | microRNA 3970                                                               | 1.09                                 | -1.75                                |
| NR_032296                         | Mir770        | microRNA 770                                                                | 1.69                                 | 2.36                                 |
| NR_031933                         | Mir219-2      | microRNA mir-219-2                                                          | 1.30                                 | 1.84                                 |
| NR_032119                         | Mir543        | microRNA mir-543                                                            | 1.09                                 | 1.69                                 |
| NR_032286                         | Mir598        | microRNA mir-598                                                            | -1.18                                | 1.81                                 |
| MTA_TR0X00002108.mm               | Mir7092       | microRNA mir-7092                                                           | -2.41                                | -1.22                                |
| NR_032286_2                       | Mir598        | microRNA mir-598                                                            | -1.18                                | 1.81                                 |
| <i>Protein Kinase/Phosphatase</i> |               |                                                                             |                                      |                                      |
| NM_017336                         | Ptpro         | protein tyrosine phosphatase, receptor type, O                              | -1.73                                | -1.10                                |
| NM_053551                         | Pdk4          | pyruvate dehydrogenase kinase, isozyme 4                                    | -1.68                                | 1.12                                 |
| NM_001193568                      | Sgk1          | serum/glucocorticoid regulated kinase 1                                     | -1.75                                | 1.19                                 |
| <i>Proteolysis</i>                |               |                                                                             |                                      |                                      |
| NM_020091                         | Cym           | chymosin                                                                    | 1.90                                 | -3.94                                |
| <i>Signal Transduction</i>        |               |                                                                             |                                      |                                      |
| NM_012798                         | Mal           | mal, T-cell differentiation protein                                         | 1.71                                 | 1.41                                 |
| NM_022589                         | Tspan2        | tetraspanin 2                                                               | 1.50                                 | 1.65                                 |
| NM_001271297                      | Spock1        | sparc/osteonectin, cwcv and kazal-like domains<br>proteoglycan (testican) 1 | 1.73                                 | 1.47                                 |
| NM_001106227                      | Tmem160       | transmembrane protein 160                                                   | 1.65                                 | 1.15                                 |
| NM_001109426                      | Tmem88b       | transmembrane protein 88B                                                   | 1.71                                 | 1.79                                 |
| NM_181381                         | Abcg2         | ATP-binding cassette, subfamily G, member 2                                 | 2.27                                 | 1.84                                 |
| <i>Synaptic Plasticity</i>        |               |                                                                             |                                      |                                      |
| NM_001107251                      | Fezf2         | Fez family zinc finger 2                                                    | -1.24                                | -1.82                                |
| NM_001109306                      | Satb2         | SATB homeobox 2                                                             | -1.15                                | -1.86                                |
| <i>Transcription</i>              |               |                                                                             |                                      |                                      |
| NM_001106571                      | Lhx2          | LIM homeobox 2                                                              | -1.17                                | -1.73                                |

**Supplement Table S3. Classification of genes with altered expression in the striatum of rats receiving non-contingent footshocks.**

| <b>GenBank<br/>Accession</b>       | <b>Gene Symbol</b> | <b>Description</b>                                 | <b>Fold Change<br/>YSR vs CT</b> | <b>Fold<br/>Change<br/>YSS vs CT</b> | <b>Fold Change<br/>YSR vs YSS</b> |
|------------------------------------|--------------------|----------------------------------------------------|----------------------------------|--------------------------------------|-----------------------------------|
| <b><i>Biological Function</i></b>  |                    |                                                    |                                  |                                      |                                   |
| NM_001106087                       | Tex15              | testis expressed 15                                | 1.21                             | -1.49                                | 1.80                              |
| NM_001191922                       | Shisa6             | shisa family member 6                              | -1.48                            | 1.97                                 | -2.92                             |
| <b><i>Calcium Ion Binding</i></b>  |                    |                                                    |                                  |                                      |                                   |
| NM_001108586                       | Rcn1               | reticulocalbin 1, EF-hand calcium binding domain   | -1.29                            | -1.96                                | 1.52                              |
| NM_001276720                       | Otof               | otoflerin; Unannotated AceView Transcript          | -1.23                            | 1.52                                 | -1.86                             |
| NM_022302                          | Necab1             | N-terminal EF-hand calcium binding protein 1       | 1.18                             | 1.70                                 | -1.44                             |
| <b><i>Cell Adhesion</i></b>        |                    |                                                    |                                  |                                      |                                   |
| NM_001169129                       | Pcdh19             | protocadherin 19                                   | -1.16                            | 1.82                                 | -2.11                             |
| NM_053393                          | Cdh8               | cadherin 8                                         | -1.36                            | -1.73                                | 1.27                              |
| XM_001056235.6                     | Pcdhb22            | protocadherin beta 22                              | -1.49                            | -1.74                                | 1.17                              |
| <b><i>Cell Differentiation</i></b> |                    |                                                    |                                  |                                      |                                   |
| XM_008768150.2                     | Slfn5              | schlafen family member 5                           | 1.57                             | -1.14                                | 1.78                              |
| <b><i>DNA Binding</i></b>          |                    |                                                    |                                  |                                      |                                   |
| XM_008761346.2                     | Hist2h3c2          | histone cluster 2, H3c2                            | 1.09                             | -1.87                                | 2.04                              |
| <b><i>Membrane Structure</i></b>   |                    |                                                    |                                  |                                      |                                   |
| NM_001044269                       | Tmem19             | transmembrane protein 196                          | 1.17                             | 2.29                                 | -1.96                             |
| XM_006230914.2                     | LOC102548568       | vegetative cell wall protein gp1-like              | 1.90                             | -1.14                                | 2.18                              |
| <b><i>Metabolism</i></b>           |                    |                                                    |                                  |                                      |                                   |
| NM_001013084                       | Akr1b1             | aldo-keto reductase family 1                       | -2.91                            | -1.29                                | -2.25                             |
| NM_001080756                       | Car12              | carbonic anhydrase 12                              | 2.32                             | 1.21                                 | 1.92                              |
| NM_001105987                       | Tatdn3             | TatD DNase domain containing 3                     | -2.27                            | -1.02                                | -2.24                             |
| NM_001106181                       | Dus2               | dihydrouridine synthase 2                          | -1.79                            | -1.81                                | 1.01                              |
| NM_001108820                       | Gla                | galactosidase, alpha                               | 1.68                             | 1.25                                 | 1.34                              |
| NM_001142915                       | Plod2              | procollagen lysine, 2-oxoglutarate 5-dioxygenase 2 | 1.73                             | -1.17                                | 2.01                              |
| NM_001145163                       | Ube2ql             | ubiquitin-conjugating enzyme E2Q family-like 1     | -1.52                            | 1.74                                 | -2.64                             |
| NM_020091                          | Cym                | chymosin                                           | -1.75                            | 1.55                                 | -2.72                             |
| NM_023025                          | Cyp2j4             | cytochrome P450, family 2, subfamily j             | -1.10                            | -1.78                                | 1.62                              |
| NM_031655                          | Lxn                | latexin                                            | 1.17                             | 2.04                                 | -1.74                             |
| NM_031776                          | Gda                | guanine deaminase                                  | -1.07                            | 2.27                                 | -2.42                             |
| NM_053562                          | Rpe65              | retinal pigment epithelium 65                      | 1.89                             | -1.06                                | 2.02                              |
| NM_053850                          | Blvra              | biliverdin reductase A                             | -1.06                            | 1.59                                 | -1.68                             |
| NM_144737                          | Fmo2               | flavin containing monooxygenase 2                  | 2.69                             | 1.11                                 | 2.42                              |
| XM_008762861.2                     | LOC100910708       | aldose reductase-related protein 1-like            | -2.81                            | -1.16                                | -2.41                             |
| <b><i>MicroRNA</i></b>             |                    |                                                    |                                  |                                      |                                   |
| NR_032119                          | Mir543             | microRNA mir-543                                   | 1.24                             | 1.84                                 | -1.49                             |

|                                                               |              |                                                          |       |       |       |
|---------------------------------------------------------------|--------------|----------------------------------------------------------|-------|-------|-------|
| NR_105854                                                     | Mirlet7k     | microRNA let-7k                                          | -1.34 | 1.25  | -1.67 |
| NR_130330                                                     | Mir6691      | microRNA 6691                                            | -2.11 | -1.14 | -1.85 |
| <b><i>Oxygen Transporter Activity</i></b>                     |              |                                                          |       |       |       |
| NM_033234                                                     | Hbb          | hemoglobin, beta                                         | -1.12 | -2.13 | 1.90  |
| NM_198776                                                     | Hbb-b1       | hemoglobin, beta adult major chain                       | 1.02  | -3.33 | 3.39  |
| <b><i>Protein Binding</i></b>                                 |              |                                                          |       |       |       |
| NM_001025682                                                  | Cdr2         | cerebellar degeneration-related protein 2                | 1.62  | -1.70 | 2.76  |
| NM_001048215                                                  | Kirrel3      | kin of IRRE like 3 (Drosophila)                          | -1.26 | -1.74 | 1.39  |
| NM_001100172                                                  | Kctd8        | potassium channel tetramerization domain containing 8    | 1.03  | -1.9  | 1.95  |
| NM_001108454                                                  | Cpne7        | copine VII                                               | -1.24 | 2.35  | -2.91 |
| NM_001109403                                                  | C1q13        | complement component 1, q subcomponent-like 3            | -1.62 | 2.43  | -3.92 |
| NM_001126093                                                  | Pcp4l1       | Purkinje cell protein 4-like 1                           | 1.09  | -2.31 | 2.51  |
| NM_001191966                                                  | Napb         | N-ethylmaleimide-sensitive factor attachment protein,    | -1.16 | 1.81  | -2.09 |
| NM_019354                                                     | Ucp2         | uncoupling protein 2 (mitochondrial, proton carrier)     | 1.49  | -1.48 | 2.21  |
| NM_031688                                                     | Sncg         | synuclein, gamma                                         | 1.71  | -1.28 | 2.18  |
| XM_017593021.1                                                | Frmd4b       | FERM domain containing 4B                                | -1.17 | -2.12 | 1.81  |
| <b><i>Protein Phosphorylation &amp; Dephosphorylation</i></b> |              |                                                          |       |       |       |
| XM_017593903.1                                                | Sgk3         | serum/glucocorticoid regulated kinase family, member 3   | 1.34  | -1.37 | 1.83  |
| NM_001005871                                                  | Atp2b4       | ATPase, Ca <sup>++</sup> transporting, plasma membrane 4 | -1.81 | 2.43  | -4.41 |
| NM_001108951                                                  | AK5          | similar to adenylate kinase 5 isoform 1                  | 1.06  | 2.00  | -1.89 |
| NM_017336                                                     | Ptpro        | protein tyrosine phosphatase, receptor type, O           | 2.19  | -1.03 | 2.25  |
| NM_031571                                                     | Acvr2a       | activin A receptor, type IIA                             | 1.07  | 2.23  | -2.08 |
| NM_053551                                                     | Pdk4         | pyruvate dehydrogenase kinase, isozyme 4                 | 2.57  | 1.49  | 1.73  |
| NM_182842                                                     | Camk1g       | calcium/calmodulin-dependent protein kinase IG           | -1.30 | 2.20  | -2.86 |
| <b><i>Signal Transduction</i></b>                             |              |                                                          |       |       |       |
| XM_002729002.3                                                | Iqgap2       | IQ motif containing GTPase activating protein 2          | 1.38  | -1.41 | 1.94  |
| XM_003748966.4                                                | LOC100912217 | olfactory receptor 10A3-like                             | -1.30 | 1.28  | -1.66 |
| NM_001002830                                                  | Ras11b       | RAS-like family 11 member B                              | 1.08  | 1.89  | -1.75 |
| NM_001004263                                                  | Itgb6        | integrin, beta 6                                         | 1.27  | -1.71 | 2.18  |
| NM_001014092                                                  | Paqr5        | progesterone and adipoQ receptor family member V         | 1.60  | -1.03 | 1.65  |
| NM_001014232                                                  | Cnrip1       | cannabinoid receptor interacting protein 1               | -1.16 | 1.87  | -2.18 |
| NM_001047084                                                  | Rgs18        | regulator of G-protein signaling 18                      | -1.29 | 1.94  | -2.50 |
| NM_001106124                                                  | Slc39a       | solute carrier family 39 (zinc transporter)              | 1.52  | 2.07  | -1.36 |
| NM_001109295                                                  | Cplx3        | complexin 3                                              | -1.38 | 1.98  | -2.74 |
| NM_001130575                                                  | Rspo2        | R-spondin 2                                              | -1.11 | 1.84  | -2.05 |
| NM_001166578                                                  | Cnih3        | cornichon family AMPA receptor auxiliary protein 3       | -1.33 | 1.68  | -2.23 |
| NM_001191953                                                  | Pgm5         | phosphoglucomutase 5                                     | -1.32 | -1.76 | 1.33  |
| NM_001257349                                                  | Gng2         | guanine nucleotide binding protein (G protein)           | -1.40 | 2.11  | -2.95 |
| NM_001287022                                                  | Rgs21        | regulator of G-protein signaling 21                      | 1.08  | 1.83  | -1.69 |
| NM_012827                                                     | Bmp4         | bone morphogenetic protein 4                             | 1.61  | -1.67 | 2.69  |

|                      |         |                                                          |       |       |       |
|----------------------|---------|----------------------------------------------------------|-------|-------|-------|
| NM_012832            | Chrna7  | cholinergic receptor, nicotinic, alpha 7 (neuronal)      | -1.03 | 1.67  | -1.72 |
| NM_012853            | Htr4    | 5-hydroxytryptamine (serotonin) receptor 4               | -1.16 | 1.54  | -1.79 |
| NM_013069            | Cd74    | Cd74 molecule, major histocompatibility complex          | 1.59  | -1.53 | 2.43  |
| NM_013099            | Mc4r    | melanocortin 4 receptor                                  | 1.05  | 3.11  | -2.95 |
| NM_017295            | Gabra5  | gamma-aminobutyric acid (GABA) A receptor, alpha 5       | -1.82 | 1.77  | -3.21 |
| NM_017296            | Kcnj2   | potassium inwardly-rectifying channel, subfamily J       | -1.66 | -1.38 | -1.21 |
| NM_017310            | Sema3a  | sema domain, immunoglobulin domain (Ig), short basic do  | -1.04 | 2.68  | -2.8  |
| NM_017362            | Chrm5   | cholinergic receptor, muscarinic 5                       | -1.13 | 3.05  | -3.45 |
| NM_019348            | Sstr2   | somatostatin receptor 2                                  | -1.02 | 1.79  | -1.83 |
| NM_019374            | Pdyn    | prodynorphin                                             | -1.23 | 1.09  | -1.35 |
| NM_022202            | Grm8    | glutamate receptor, metabotropic 8                       | -1.11 | 2.12  | -2.36 |
| NM_022266            | Ctgf    | connective tissue growth factor                          | -1.24 | 2.08  | -2.58 |
| NM_022632            | Slit2   | slit homolog 2 (Drosophila)                              | 2.03  | 2.21  | -1.09 |
| NM_031602            | Kcnj10  | potassium inwardly-rectifying channel, subfamily J       | 1.17  | -1.77 | 2.08  |
| NM_031823            | Wfs1    | Wolfram syndrome 1 (wolframin)                           | -1.22 | 2.86  | -3.49 |
| NM_053324            | Syt9    | synaptotagmin IX                                         | -1.29 | -2.25 | 1.74  |
| NM_053613            | Rtn4r   | reticulon 4 receptor                                     | -1.19 | 1.88  | -2.24 |
| NM_053721            | Rasgrf2 | RAS protein-specific guanine nucleotide-releasing factor | -1.06 | 3.09  | -3.27 |
| NM_080693            | Cacng5  | calcium channel, voltage-dependent, gamma subunit 5      | -1.12 | 2.45  | -2.74 |
| NM_198791            | Tlr3    | toll-like receptor 3                                     | 1.82  | -1.41 | 2.56  |
| NM_201417            | Rxfp1   | relaxin/insulin-like family peptide receptor 1           | -1.00 | 2.41  | -2.41 |
| NM_207616            | Hyal1   | hyaluronoglucosaminidase 1                               | 1.94  | 1.05  | 1.84  |
| <b>Transcription</b> |         |                                                          |       |       |       |
| XM_017591165.1       | Mef2c   | myocyte enhancer factor 2C; similar to myocyte enhancer  | 1.21  | 1.80  | -1.49 |
| NM_001034002         | Yap1    | yes-associated protein 1                                 | 1.37  | -1.23 | 1.69  |
| NM_001106895         | Tfap2d  | transcription factor AP-2 delta                          | -1.06 | 1.65  | -1.76 |
| NM_001134706         | Hmgn5b  | high mobility group nucleosome binding domain 5B         | 1.43  | -1.18 | 1.68  |
| NM_001191846         | Foxo1   | forkhead box O1;                                         | -1.29 | -2.74 | 2.12  |
| NM_013058            | Id3     | inhibitor of DNA binding 3                               | 1.14  | -1.77 | 2.02  |
| NM_017149            | Meox2   | mesenchyme homeobox 2                                    | -1.35 | -1.85 | 1.37  |
| NM_019328            | Nr4a2   | nuclear receptor subfamily 4, group A, member 2          | 1.03  | 6.74  | -6.56 |
| NM_024360            | Hes1    | hes family bHLH transcription factor 1                   | 1.67  | 1.15  | 1.45  |
| NM_031059            | Msx1    | msh homeobox 1                                           | 2.38  | -1.02 | 2.42  |
| NM_138838            | Pou3f1  | POU class 3 homeobox 1                                   | -1.60 | -1.81 | 1.13  |
| <b>Unknown</b>       |         |                                                          |       |       |       |
| XM_008770180.1       | Nwd2    | NACHT and WD repeat domain containing 2                  | 1.01  | 2.04  | -2.02 |
| NM_001009701         | Itfg3   | integrin alpha FG-GAP repeat containing 3                | 1.10  | -1.69 | 1.85  |
| NM_001024369         | Ypel4   | yippee-like 4 (Drosophila)                               | -1.16 | 1.72  | -2.00 |

**Supplement Table S4. Classification of striatal genes with altered expression after footshocks in the presence or absence of METH SA.**

| <b>GenBank<br/>Accession</b>       | <b>Gene Symbol</b> | <b>Description</b>                                      | <b>Fold<br/>Change<br/>SR vs YSR</b> | <b>Fold<br/>Change<br/>SS vs YSS</b> |
|------------------------------------|--------------------|---------------------------------------------------------|--------------------------------------|--------------------------------------|
| <i>Biological Function</i>         |                    |                                                         |                                      |                                      |
| NM_001034011                       | Sft2d2             | SFT2 domain containing 2                                | -1.73                                | -1.19                                |
| NM_001106087                       | Tex15              | testis expressed 15                                     | -1.25                                | 2.26                                 |
| NM_001107445                       | Hspa12a            | heat shock protein 12A                                  | 1.75                                 | 1.05                                 |
| NM_001191752                       | Ccdc77             | coiled-coil domain containing 77                        | 2.14                                 | 2.75                                 |
| <i>Calcium Ion Binding</i>         |                    |                                                         |                                      |                                      |
| NM_001106879                       | Efhb               | EF hand domain family, member B                         | -2.64                                | 1.58                                 |
| <i>Cell Differentiation</i>        |                    |                                                         |                                      |                                      |
| NM_001014163                       | Cend1              | cell cycle exit and neuronal differentiation 1          | 2.10                                 | 1.15                                 |
| <i>DNA Binding</i>                 |                    |                                                         |                                      |                                      |
| NM_001013181                       | Zbtb16             | zinc finger and BTB domain containing 16                | -2.04                                | -1.41                                |
| <i>Immunity</i>                    |                    |                                                         |                                      |                                      |
| XM_008760831.1                     | C7                 | complement C7                                           | -5.16                                | -1.04                                |
| <i>Metabolism</i>                  |                    |                                                         |                                      |                                      |
| NM_001013084                       | Akr1b1             | aldo-keto reductase family 1                            | 2.85                                 | 1.22                                 |
| NM_001048042                       | Nmnat2             | nicotinamide nucleotide adenyltransferase 2             | 1.66                                 | -1.04                                |
| NM_001080756                       | Car12              | carbonic anhydrase 12                                   | -2.12                                | 1.30                                 |
| NM_001135756                       | Galnt6             | polypeptide N-acetylgalactosaminyltransferase-like 6    | 1.79                                 | 1.05                                 |
| NM_001142915                       | Plod2              | procollagen lysine, 2-oxoglutarate 5-dioxygenase 2      | -1.65                                | 1.33                                 |
| NM_001191674                       | Pld5               | phospholipase D family, member 5                        | 1.65                                 | -1.02                                |
| NM_001258237                       | Ace3               | angiotensin I converting enzyme (peptidyl-dipeptidase A | -2.55                                | 2.22                                 |
| NM_012886                          | Timp3              | TIMP metalloproteinase inhibitor 3                      | -1.97                                | 1.64                                 |
| NM_013096                          | Hba1               | hemoglobin, alpha 1                                     | -1.04                                | 1.71                                 |
| NM_016994                          | C3                 | complement component 3                                  | -1.11                                | 1.93                                 |
| NM_020091                          | Cym                | chymosin                                                | 1.86                                 | -2.53                                |
| NM_021776                          | Ecel               | endothelin converting enzyme-like 1                     | 1.77                                 | 1.05                                 |
| NM_022215                          | Gpd1               | glycerol-3-phosphate dehydrogenase 1 (soluble)          | -2.29                                | -1.78                                |
| NM_130744                          | Cygb               | cytoglobin                                              | 2.35                                 | -1.02                                |
| NM_144737                          | Fmo2               | flavin containing monooxygenase 2                       | -2.54                                | 1.30                                 |
| XM_006247643.3                     | LOC102556346       | angiotensin-converting enzyme-like                      | -3.72                                | 4.15                                 |
| XM_008762861.2                     | LOC100910708       | aldose reductase-related protein 1-like                 | 2.79                                 | 1.10                                 |
| <i>MicroRNA</i>                    |                    |                                                         |                                      |                                      |
| NR_035479                          | Mir1954            | microRNA 1954                                           | 1.84                                 | -1.90                                |
| NR_035497                          | Mir1970            | microRNA 1970                                           | -1.67                                | -1.56                                |
| NR_037339                          | Mir466d            | microRNA mir-466d                                       | 1.17                                 | -2.19                                |
| NR_105756                          | Mir6338            | microRNA mir-6338                                       | 1.92                                 | 1.08                                 |
| NR_106128                          | Mir7668            | microRNA mir-7668                                       | -1.10                                | -1.70                                |
| NR_130330                          | Mir6691            | microRNA 6691                                           | 1.75                                 | -1.16                                |
| <i>Oxygen Transporter Activity</i> |                    |                                                         |                                      |                                      |
| NM_033234                          | Hbb                | hemoglobin, beta                                        | -1.35                                | 1.55                                 |
| NM_198776                          | Hbb-b1             | hemoglobin, beta adult major chain                      | -1.77                                | 2.46                                 |
| <i>Protein Binding</i>             |                    |                                                         |                                      |                                      |

|                                                               |          |                                                        |       |       |
|---------------------------------------------------------------|----------|--------------------------------------------------------|-------|-------|
| NM_001025682                                                  | Cdr2     | cerebellar degeneration-related protein 2              | -1.97 | 1.94  |
| NM_001108750                                                  | Cpne8    | copine VIII                                            | 1.94  | 1.09  |
| NM_001109210                                                  | Cbln4    | cerebellin 4 precursor                                 | 1.47  | -1.68 |
| NM_013060                                                     | Id2      | inhibitor of DNA binding 2                             | -1.75 | -1.17 |
| NM_017110                                                     | Cartpt   | CART prepropeptide                                     | 1.87  | -1.37 |
| NM_031688                                                     | Sncg     | synuclein, gamma                                       | -2.37 | 1.51  |
| XM_017593021.1                                                | Frm4b    | FERM domain containing 4B                              | -1.05 | 1.87  |
| XM_575125.6                                                   | Wdr38    | WD repeat domain 38                                    | -1.70 | 1.10  |
| <b><i>Protein Phosphorylation &amp; Dephosphorylation</i></b> |          |                                                        |       |       |
| NM_001108055                                                  | Ak7      | adenylate kinase 7                                     | -1.81 | -1.05 |
| NM_001193568                                                  | Sgk1     | serum/glucocorticoid regulated kinase 1                | -2.52 | -1.21 |
| NM_031004                                                     | Acta2    | actin, alpha 2, smooth muscle, aorta                   | 1.82  | -1.02 |
| NM_053551                                                     | Pdk4     | pyruvate dehydrogenase kinase, isozyme 4               | -2.89 | -1.41 |
| <b><i>Signal Transduction</i></b>                             |          |                                                        |       |       |
| XM_575397.7                                                   | Wnt2     | wingless-type MMTV integration site family member 2    | 1.01  | -1.78 |
| NM_001000068.1                                                | Olr1024  | olfactory receptor 1024                                | 1.06  | -1.79 |
| NM_001001019                                                  | Olr349   | olfactory receptor 349                                 | 1.78  | 1.07  |
| NM_001004263                                                  | Itgb6    | integrin, beta 6                                       | -1.89 | 1.83  |
| NM_001008555                                                  | Slc10a   | solute carrier family 10, member 4                     | 1.98  | 1.35  |
| NM_001012116                                                  | Spag1    | sperm associated antigen 1                             | -1.76 | 1.21  |
| NM_001014071                                                  | Errfi1   | ERBB receptor feedback inhibitor 1                     | -1.70 | -1.00 |
| NM_001024241                                                  | Gpr139   | G protein-coupled receptor 139                         | 3.27  | 1.29  |
| NM_001024979                                                  | Gpatch4  | G patch domain containing 4                            | -2.02 | -1.52 |
| NM_001169138                                                  | Thbs2    | thrombospondin 2                                       | -2.52 | 1.41  |
| NM_012665                                                     | Syt2     | synaptotagmin II                                       | 1.69  | 1.28  |
| NM_012827                                                     | Bmp4     | bone morphogenetic protein 4                           | -1.42 | 2.18  |
| NM_013036                                                     | Sstr4    | somatostatin receptor 4                                | 1.07  | -1.66 |
| NM_019374                                                     | Pdyn     | prodynorphin                                           | 1.79  | 1.03  |
| NM_023970                                                     | Trpv4    | transient receptor potential cation channel            | -1.85 | 1.14  |
| NM_053296                                                     | Glr3     | glycine receptor, beta                                 | 1.77  | -1.08 |
| NM_053521                                                     | Slc5a7   | solute carrier family 5 (sodium/choline cotransporter) | 1.67  | 1.41  |
| NM_080693                                                     | Cacng5   | calcium channel, voltage-dependent, gamma subunit 5    | 2.31  | -1.69 |
| NM_130816                                                     | Fgf11    | fibroblast growth factor 11                            | 2.01  | 1.05  |
| NM_181381                                                     | Abcg2    | ATP-binding cassette, subfamily G (WHITE), member 2    | 1.97  | 1.82  |
| NM_198791                                                     | Tlr3     | toll-like receptor 3                                   | -1.72 | 1.86  |
| <b><i>Transcription</i></b>                                   |          |                                                        |       |       |
| XM_017596208.1                                                | Rbms3    | RNA binding motif, single stranded interacting protein | 1.71  | 1.17  |
| XM_006247958.3                                                | Znf750   | zinc finger protein 750                                | -1.87 | 1.23  |
| NM_001005882                                                  | Rbm47    | RNA binding motif protein 47                           | -1.93 | 1.25  |
| NM_012943                                                     | Dlx5     | distal-less homeobox 5                                 | 1.82  | 1.03  |
| NM_031059                                                     | Msx1     | msh homeobox 1                                         | -2.25 | 1.22  |
| <b><i>Unknown</i></b>                                         |          |                                                        |       |       |
| XM_017599433.1                                                | Fam47e   | family with sequence similarity 47, member E           | -2.02 | 1.24  |
| XM_017596811.1                                                | KIAA2012 | similar to KIAA2012 protein                            | -1.71 | 1.21  |
| NM_001106527                                                  | Tspyl3   | TSPY-like 3                                            | 1.65  | -1.13 |

**Supplement Table S5. RNA Integrity Number (RIN) of samples used in  
Affymetrix array**

| Sample | RIN Number           |          |
|--------|----------------------|----------|
|        | Nucleus<br>accumbens | Striatum |
| CT 1   | 8.5                  | 9.3      |
| CT 2   | 8.7                  | 9.1      |
| CT 3   | 8.8                  | 9.3      |
| CT 4   | 8.7                  | 9.2      |
| CT 5   | 8.7                  | 8.8      |
| CT 6   | 8.6                  | 8.6      |
| SR 1   | 8.6                  | 9.2      |
| SR 2   | 8.6                  | 9.1      |
| SR 3   | 8.6                  | 8.9      |
| SR 4   | 8.9                  | 9.0      |
| SR 5   | 8.7                  | 9.3      |
| SR 6   | 8.6                  | 9.3      |
| SS 1   | 8.4                  | 8.9      |
| SS 2   | 8.8                  | 8.9      |
| SS 3   | 8.9                  | 8.8      |
| SS 4   | 8.8                  | 8.7      |
| SS 5   | 8.7                  | 8.8      |
| SS 6   | 8.6                  | 8.9      |
| YSR 1  | 8.4                  | 9.3      |
| YSR 2  | 8.5                  | 8.8      |
| YSR 3  | 8.7                  | 9.2      |
| YSS 1  | 8.6                  | 9.2      |
| YSS 2  | 8.7                  | 9.2      |
| YSS 3  | 8.5                  | 9.0      |

RIN takes into account the values for 28S, 18S and small ribosomal RNAs compared to one another as well as the total signal. RIN is used for assigning integrity values to RNA measurements. The higher RIN correlates with better outcomes of RT-PCR and microarrays. Schroeder et. al. (2006) demonstrated that the RIN greater than 6 to be of high quality. Note, the RIN values are all equal or greater than 8.4

Schroeder, A. et al. (2006) The RIN: an RNA integrity number for assigning integrity values to RNA measurements. BMC Mol. Biol. 7: 3.
